# Supplementary material for: Metformin attenuates central sensitization by regulating neuroinflammation through the TREM2-SYK signaling pathway in a mouse model of chronic migraine
Source: PubMed Central journal article supplement — J Neuroinflammation. 2024 Dec 3;21:318. doi: 10.1186/s12974-024-03313-2 (PMC11613737; doi:10.1186/s12974-024-03313-2), 2024-12-03

Fig. 1H

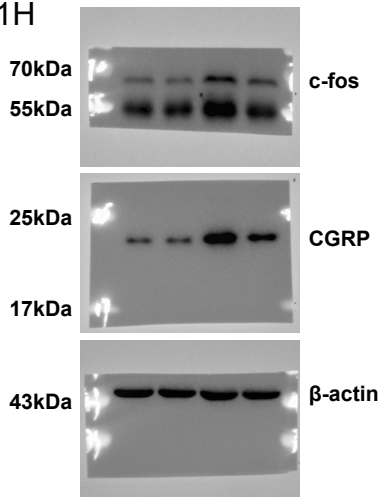

Fig. 2A

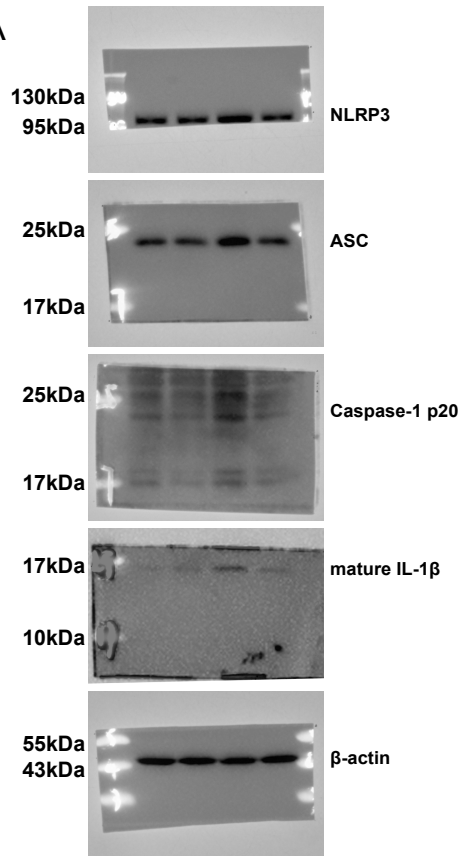

Fig. 3A

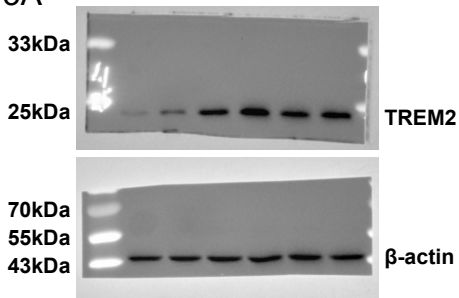

Fig. 4A

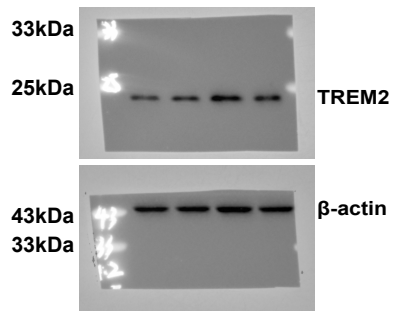

Fig. 4C

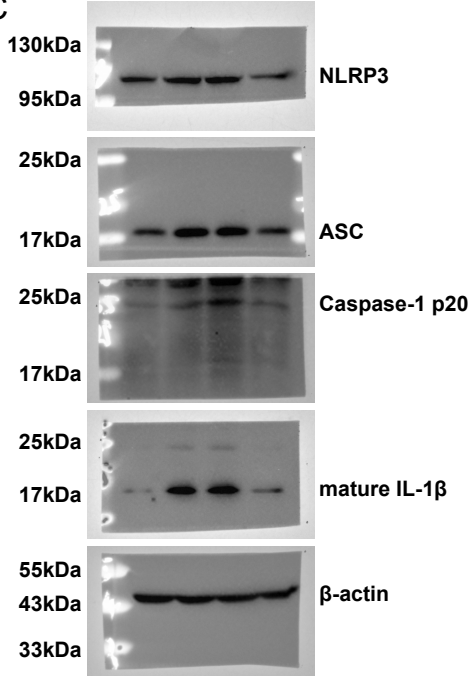

Fig. 4H

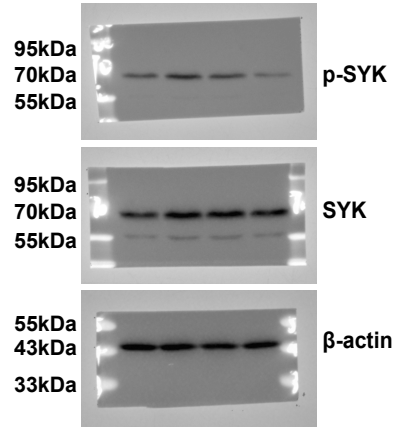

Fig. 5C

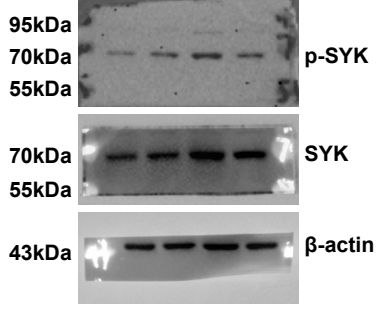

Fig. 5A

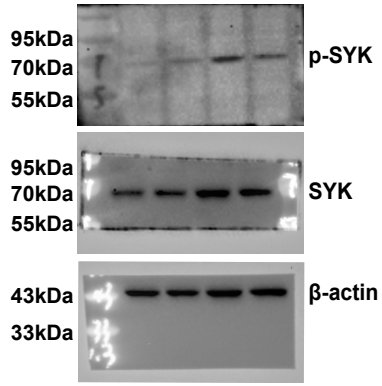

Fig. 5E

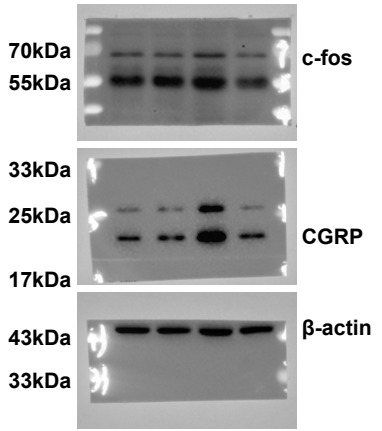

Fig. 6A

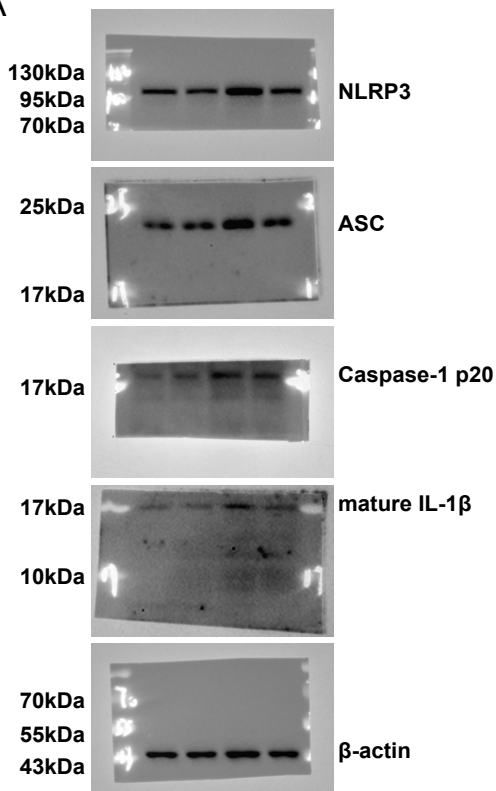

Fig. 7A

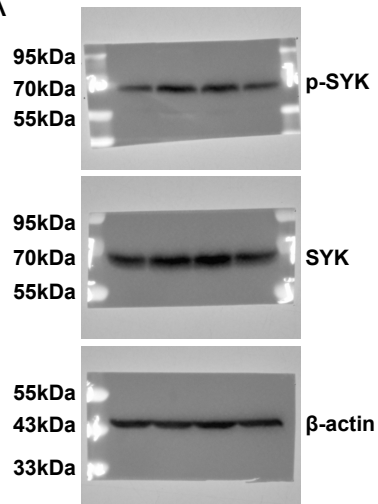

Fig. 7C

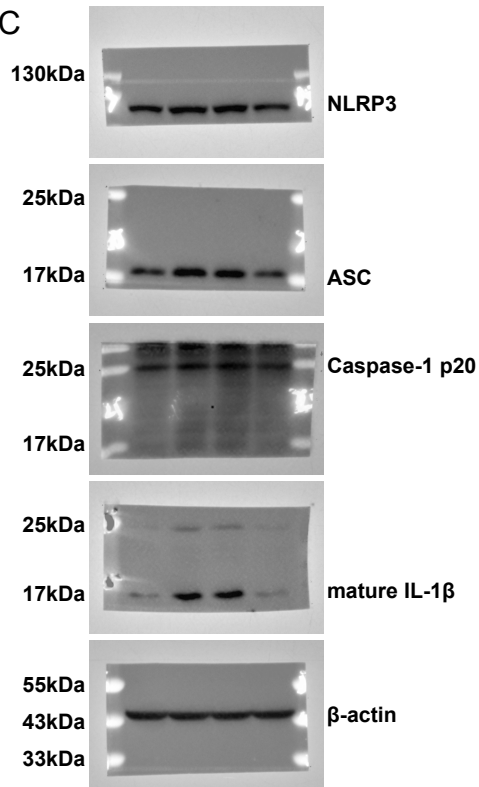

Fig. 7H

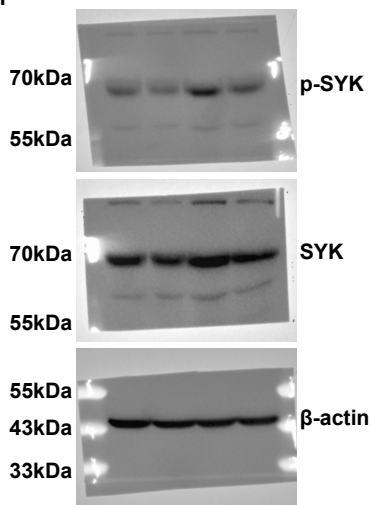

Fig. 7J

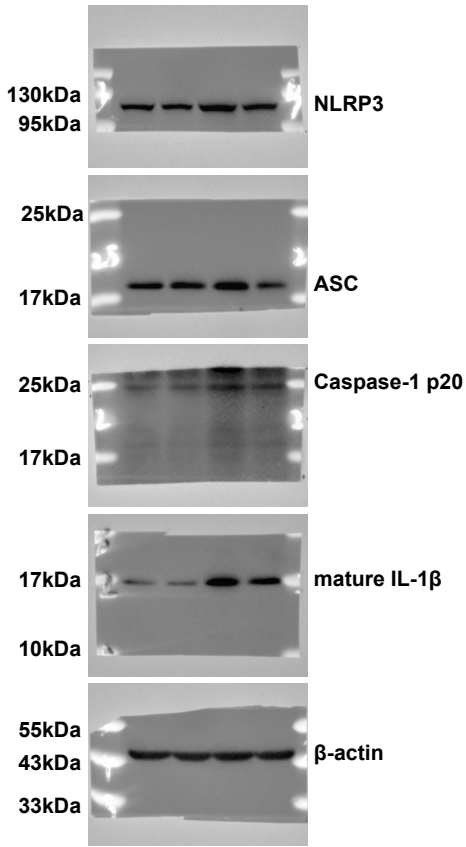

Fig. S1A

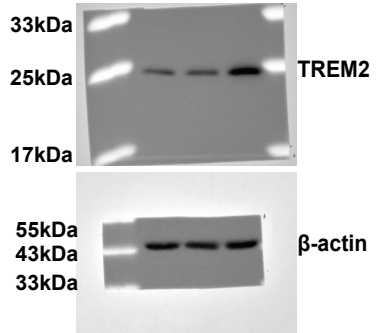

Fig. 7O

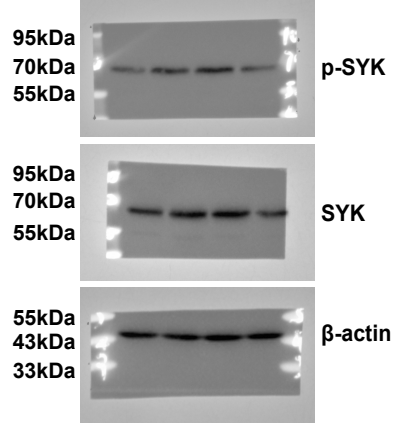

Fig. S2A

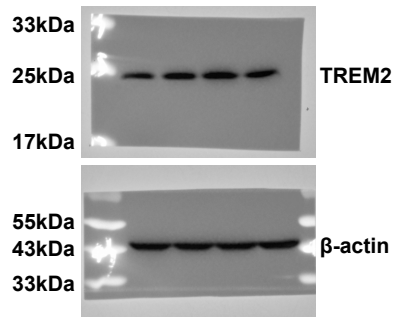

Fig. S2C

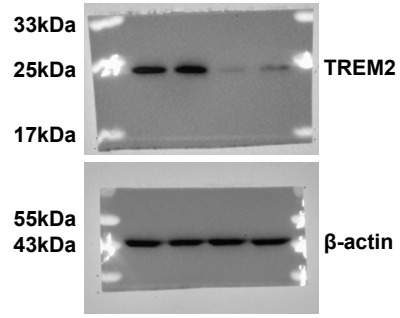

Fig. S2E

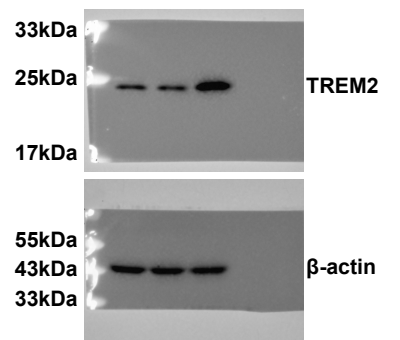

Supplement: 12974_2024_3313_MOESM3_ESM.pdf [file 12974_2024_3313_MOESM3_ESM.pdf]
